# Supplementary material for: Natural RNA circles function as efficient microRNA sponges
Source: Springer Nature journal article supplement (doi:10.1038/nature11993), 2013-02-26
Supplement: 41586_2013_BFnature11993_MOESM114_ESM.pdf [file 41586_2013_BFnature11993_MOESM114_ESM.pdf]

**Supplementary Table 1: Primers and probes.** Sequences are written in 5'-3' direction.

**Vector construction**

|                         |                                               |
|-------------------------|-----------------------------------------------|
| ciRS-7 forward          | GACCCAAGCTTCTGTAAGAGTAGTCTCATGATG             |
| ciRS-7 reverse          | TTCAGGCGGCCGCCAAACTGCAGTACTGTTGGTTCAT         |
| ciRS-7ir forward        | TAGAAGCTCGAGCTGTAAGAGTAGTCTCATGATG            |
| ciRS-7ir reverse        | TAGAAGCTCGAGTGGTACTCTGGACATGAT                |
| ciRS-7fs forward        | TTCAGAAGCTTAGGGTTTCCGATGGCACCT                |
| ciRS-7fs reverse        | TAGAAGCTCGAGCTGGATATTGCAGACACTGG              |
| Sry forward             | TTCAGGGATCTGGACTAGGGAGGTCCTGAA                |
| Sry reverse             | TAGAAGCGGCCGCCAACCCAAAAGGAAGGAGCAG            |
| miR-7-1 forward         | ATAGAAGCGGCCCGCGCCATGGTGTCTCAACCTTT           |
| miR-7-1 reverse         | ATAGAAGTTCGACGCAATGTTAAGTGTCAAGAAAAATG        |
| miR-138 forward         | ATAGAAGCGGCCCGCGTCTCTCCCTCTCT                 |
| miR-138 reverse         | TAGAAGTTCGACGGTTTCTCACAGGCAGGT                |
| miR-7-psiCheck forward  | TAGAAGCTCGAGACAACAAAATCACTAGTCTCCATCTAGAATGAC |
| miR-7-psiCheck reverse  | GTCATTCTAGATGGAAGACTAGTGATTTTGTGTCTCGAGTTCTA  |
| ciRS-7-psiCheck forward | TTCAGCTCGAGGGTTTCCGATGGCACCTG                 |
| ciRS-7-psiCheck reverse | TTCAGGCGGCCCGCTGGATATTGCAGACACTG              |
| Sry-psiCheck forward    | TAGAAGCTCGAGCATTTCAGATCTTGATTTTAGTGT          |
| Sry-psiCheck reverse    | GTCATGCTAGCCAGTGTATGTCAGCTGTTAGTAAGT          |
| EGFR-psiCheck forward   | AATTGCGGCCGCCACGGAGGATAGTATGAGC               |
| EGFR-psiCheck reverse   | AATTTCTAGATTTCATTGAGACAAAAATCAAATAC           |

**qPCR / RT-PCR**

|                    |                                                |
|--------------------|------------------------------------------------|
| ciRS-7 forward     | ACGTCTCCAGTGTGCTGA                             |
| ciRS-7 reverse     | CTTGACACAGGTGCCATC                             |
| ciRS-7 (2) forward | ATAGCTTCCGAAAAATCCAG                           |
| GAPDH forward      | GTCAGCCGCATCTTCTTTTG                           |
| GAPDH reverse      | GCGCCAAATACGACCAAAATC                          |
| Sry forward        | AGTTCACGACCAGCAGCT                             |
| Sry reverse        | CAGCTGCTTGCTGATCTCTGTA                         |
| SNCA forward       | CTGCTGCTGAGAAAACCA                             |
| SNCA reverse       | CCTTGGTTTTGGAGCCTA                             |
| EGFR forward       | CGAGGGCAAATACAGCTT                             |
| EGFR reverse       | GCCGTCTTCTCCATCT                               |
| IRS2 forward       | TCTTGTCCCACCACTTGA                             |
| IRS2 reverse       | CAGTGTGAGCGCTTCTCT                             |
| Oligo-dTN          | GCGAGCACAGAATTAATACGACTCACTATAGGTTTTTTTTTTTTVN |
| 3RACE reverse      | GCGAGCACAGAATTAATACGACT                        |

**Probes**

|                                                    |                                                                                 |
|----------------------------------------------------|---------------------------------------------------------------------------------|
| miR-7 probe                                        | ACAACAAAATCACTAGTCTTCCA                                                         |
| miR-769 probe                                      | AGCTCAGAACCAGAGGTCTCA                                                           |
| miR-138 probe                                      | CGGCCTGATTCACAACACCAGCT                                                         |
| miR-15b probe                                      | TGTAAACCATGATGTGCTGCTA                                                          |
| ciRS-7 probe                                       | TTGGAAGACTTGAAGTCGCTGGAAGACCCGGAGTTGTTGGAAGACCTTGACACAGGTGCC                    |
| Sry probe                                          | GGCTGCCAATAAAGCTTTGCTGTTTTTGGAGTACAGGTGTGCAGCTACTCCAGTCT                        |
| 18S probe                                          | TTACCGGGCTGCTGGCACCAGACTTGCCCTCCAATGGATCCTCGTTAAAGGATTTAAAGTGGACTCATTCCAATTACAG |
| ciRS-7 (hsa) FISH probe (amino-allyl-T underlined) | TACATGGATTTGTTGGAAGACATGGATTTTCTGGAAGACATGGATTTTCT                              |
| ciRS-7 (mmu) FISH probe (amino-allyl-T underlined) | TTCTGGGAAGACTTGGATTTTCGGGAAGACTTGGATTTTCGGGAAGACTT                              |
| ciRS-7 (mmu) AP-probe                              | TGGGAAGACTCGGATTTCTGGGAAGACT                                                    |
| miR-7 FISH/AP-probe (LNA underlined)               | ACAACAAAATCACTAGTCTTCCA                                                         |
| miR-449 FISH Probe (LNA underlined)                | ACCAGCTAACAAATACACTGCCA                                                         |
| Gapdh AP-probe                                     | CCTGCTTACCACCTTCTTGATGTCA                                                       |

**siRNA / miRNA**

|                      |                              |
|----------------------|------------------------------|
| miR-138 biotin guide | AGCTGGTGTGTTGAATCAGGCCG[Btm] |
| miR-138 passenger    | GCCTGATTCACAACACCAGCGCC      |
| miR-7 biotin guide   | TGGAAGACTAGTGATTTTGTGTG[Btm] |
| miR-7 passenger      | CAACAAAATCACTAGTCTACCTAA     |

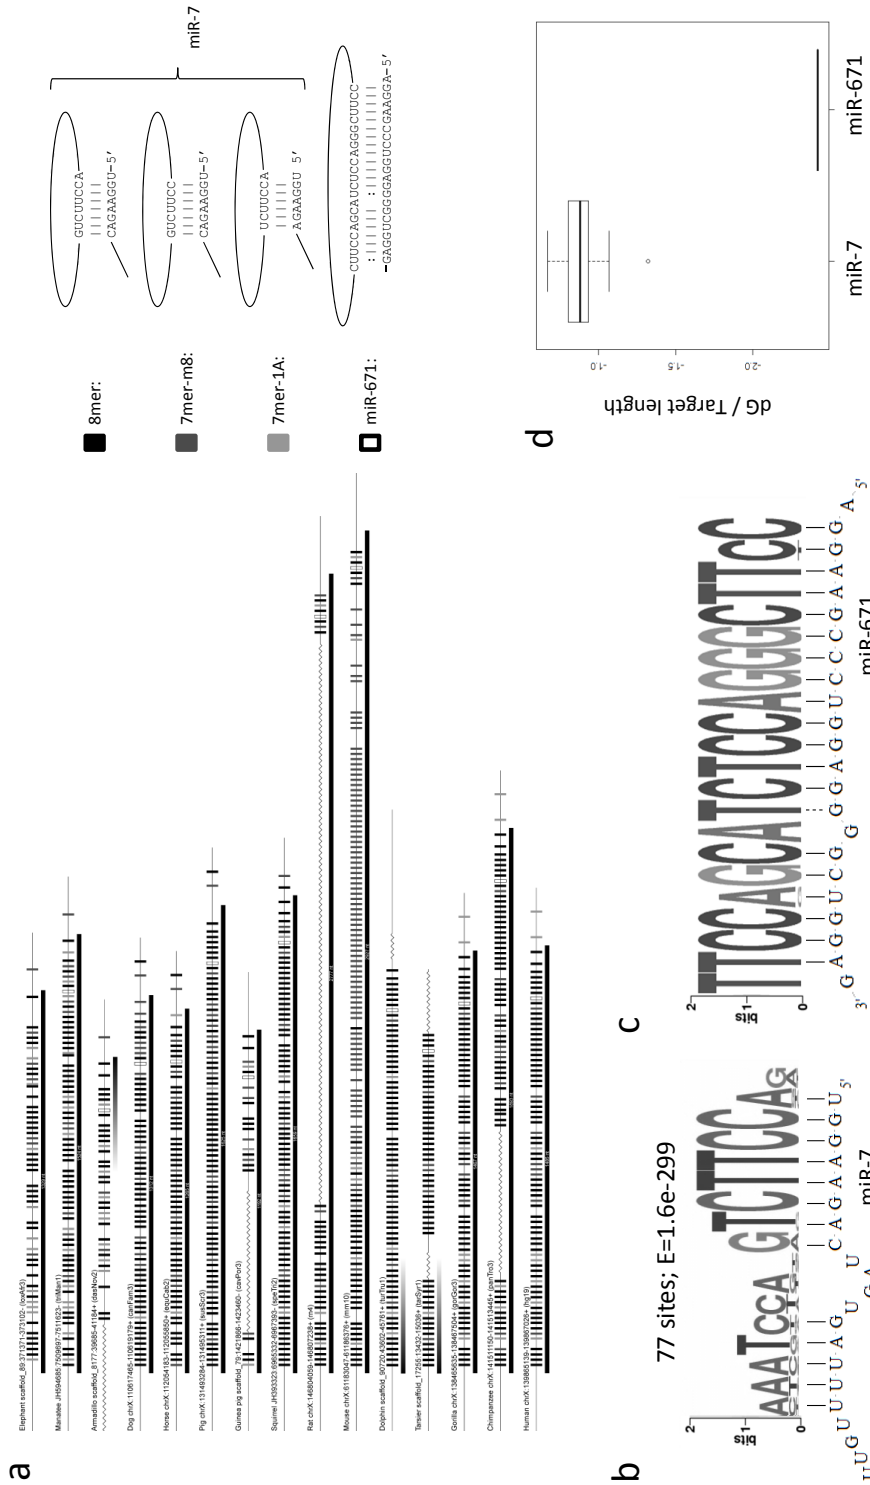

**Supplementary Figure 1: Evolutionary conservation of ciRS-7.** **a**, Organization of ciRS-7 locus in selected mammalian species. miR-7 and miR-671 target sites are denoted according to legend shown to the right. miR-671 target site is defined as the 22mer, TTCAGCATCTCCAGGGCTCC, allowing 1 mismatch. The boundaries of ciRS-7 (black horizontal bar) is based on the position of conserved splice donor (TCCAGGTATT) and splice acceptor (TCCAAT[AG]TC[CT]AGGG, optional nucleotides are shown in brackets) sites. The crinkled lines represent gaps in the genome assembly. **b**, Weblogo of the MEME-computed highest ranking 6-17mer occurring between 2 and 300 times within human ciRS-7. The motif is depicted with base pairing potential to miR-7. Not all sites predicted by MEME have perfect seed sequences, explaining the discrepancy between the 77 sites predicted by MEME and the 73 seed sites depicted in (a) **c**, Weblogo of the identified miR-671 target sites from all placental mammals investigated, as represented by non-filled boxes in (a) (except elephant, where no miR-671 sites was found) depicted with base pairing potential to miR-671. **d**, Boxplot showing thermodynamic predictions using MultIRNAFold (ver 1.1<sup>2</sup>) of 73 human miR-7 target sites (17mers) upon base pairing with miR-7 and the miR-671 target site (22mer) upon base pairing with miR-671 normalised to target site length.

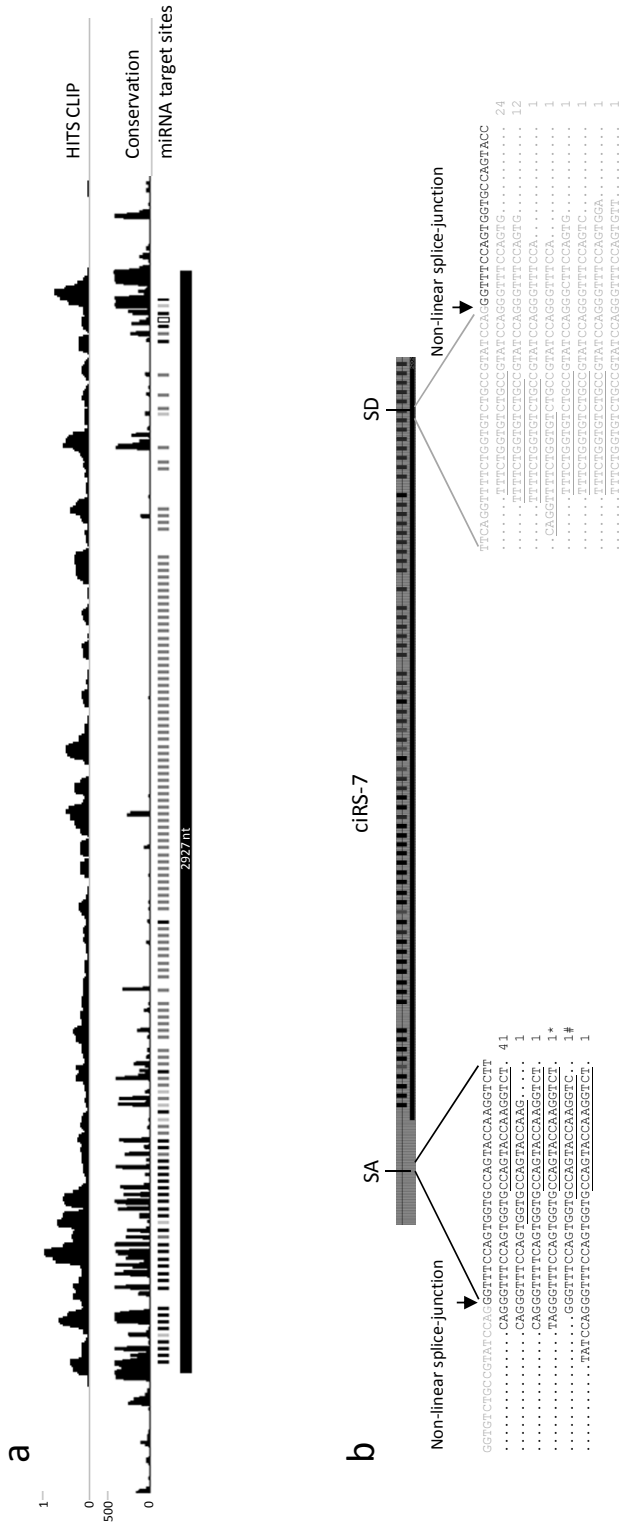

**Supplementary Figure 2: HITS-CLIP reads derived from non-linear RNA.** **a**, Schematic representation of the genomic locus encoding the murine *cirs-7* with predicted miR-7 and miR-671 target sites (as in Fig. 1a) and mammalian conservation scores. Distribution of Ago2 HITS-CLIP reads<sup>3</sup> from mouse brain is shown above. **b**, All reads from Ago2 HITS-CLIP<sup>3</sup> were trimmed to 15 nt from the 5'- or 3'-end, generating a set of 15-mers reads reflecting the 3' end or 5' end of each read, respectively. Subsequently, the 3' ends were mapped towards the 5' end of murine *cirs-7* (black sequence), whereas the 5' ends of all reads (15mers) were mapped towards the 3' end of murine *cirs-7* (grey sequence). For each perfectly mapped 15-mer (underlined), the untrimmed read was recovered and aligned to non-linear spliced *cirs-7* sequence (black-grey chimeric sequence). Read count is depicted to the right of each sequence. (\*) denotes sequence not in support of non-linear splicing of *cirs-7*. (#) denotes ambiguous sequence.

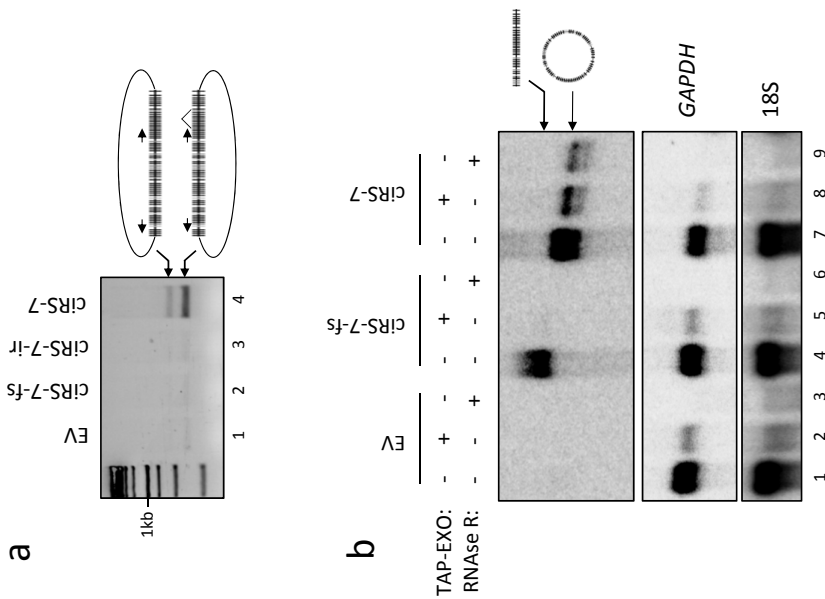

**Supplementary Figure 3: Circularization of ciRS-7.** **a**, RT-PCR on RNA from HEK293 cells transfected with pcDNA3 (EV), pcDNA3-ciRS-7-fs, pcDNA3-ciRS-7-ir, and pcDNA3-ciRS-7, as denoted above, using outwards facing primers (ciRS-7 (2) forward / ciRS-7 reverse) as depicted. The upper and lower band corresponds to inclusion or exclusion of previously identified intron<sup>4</sup> as indicated to the right. **b**, **c**, Northern blot (b) or qRT-PCR (c) on RNA from HEK293 cells transfected with empty vector (pcDNA3; EV), pcDNA3-ciRS-7-fs, and pcDNA3-ciRS-7. Prior to analysis, the RNA was either digested with Tobacco Acid Pyrophosphate that removes the 5' cap followed by Terminator 5' Exonuclease treatment (TAP-EXO), or with RNase R, as indicated. Error bars represent s.d. (n=4).

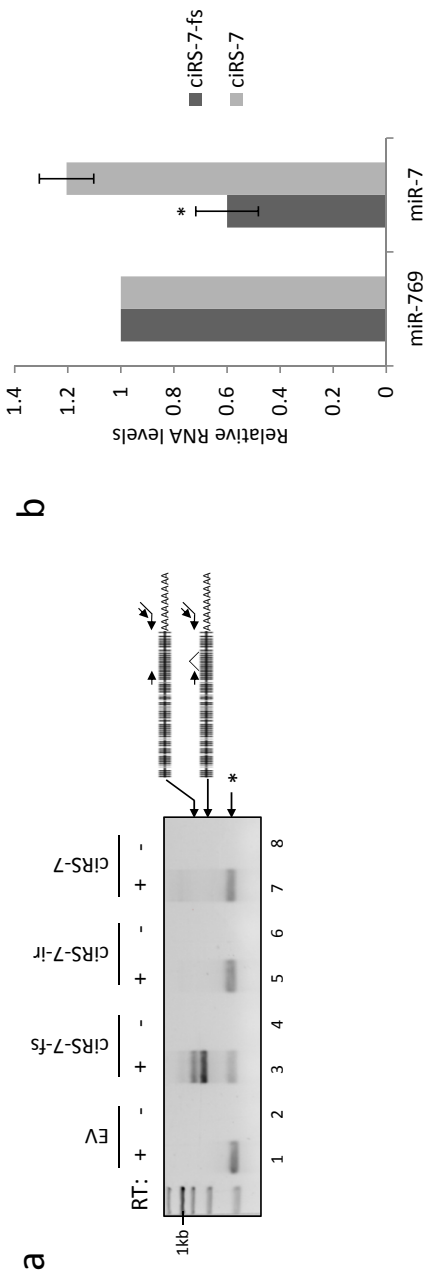

**Supplementary Figure 4: Linear version of ciRS-7 is sensitive towards miR-7.** **a**, RT-PCR on RNA from HEK293 cells transfected with pcDNA3 (EV), pcDNA3-ciRS-7-fs, pcDNA3-ciRS-7-ir, and pcDNA3-ciRS-7 using the 3'RACE approach. The upper and lower band corresponds to inclusion or exclusion of previously identified intron<sup>6</sup> as indicated to the right. **b**, Quantification of ciRS-7 levels derived from transfections with pcDNA3-ciRS-7-fs and pcDNA3-ciRS-7 along with plasmids expressing either miR-7 (pJEBB-7) or miR-769 (pJEBB-769) based on northern blot signal intensities. Error bars represent s.e.m (n=3). \*, p<0.05.

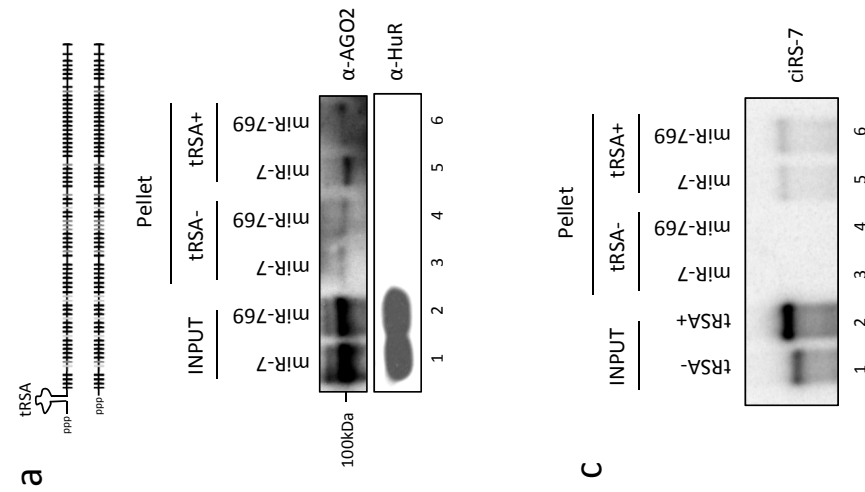

**Supplementary Figure 5: Streptavidin-aptamer capture of AGO2 and miR-7. a, b, T7-transcripts covering the entire ciRS-7 sequence with or without a streptavidin aptamer (trRSA) sequence in the 5' end (as schematically depicted above), were incubated with cell lysate pre-transfected with either miR-7 (pJEBB-7) or miR-769 (pJEBB-769) expression vectors. After streptavidin capture, the input and bound fraction were analysed by western blot using anti-AGO2 antibody ( $\alpha$ -AGO2) or anti-HuR (control;  $\alpha$ -HuR) (**a**) or by miRNA taqman® qPCR detecting miR-7 (dark bars) or miR-769 as a control (light grey bars) normalised to RNU48 and INPUT (**b**). Error bars represent s.d. (n=3). **c**, Northern blot of T7-transcribed ciRS-7 with (trRSA+) or without trRSA sequence (trRSA-) from prior (INPUT; T7 transcripts alone) and after cell lysate incubation and streptavidin capture (Pellet).**

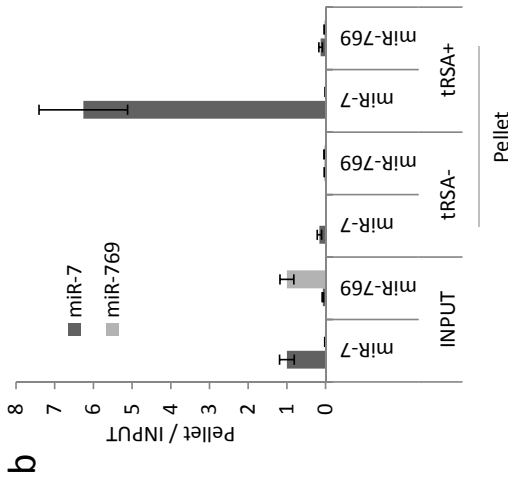

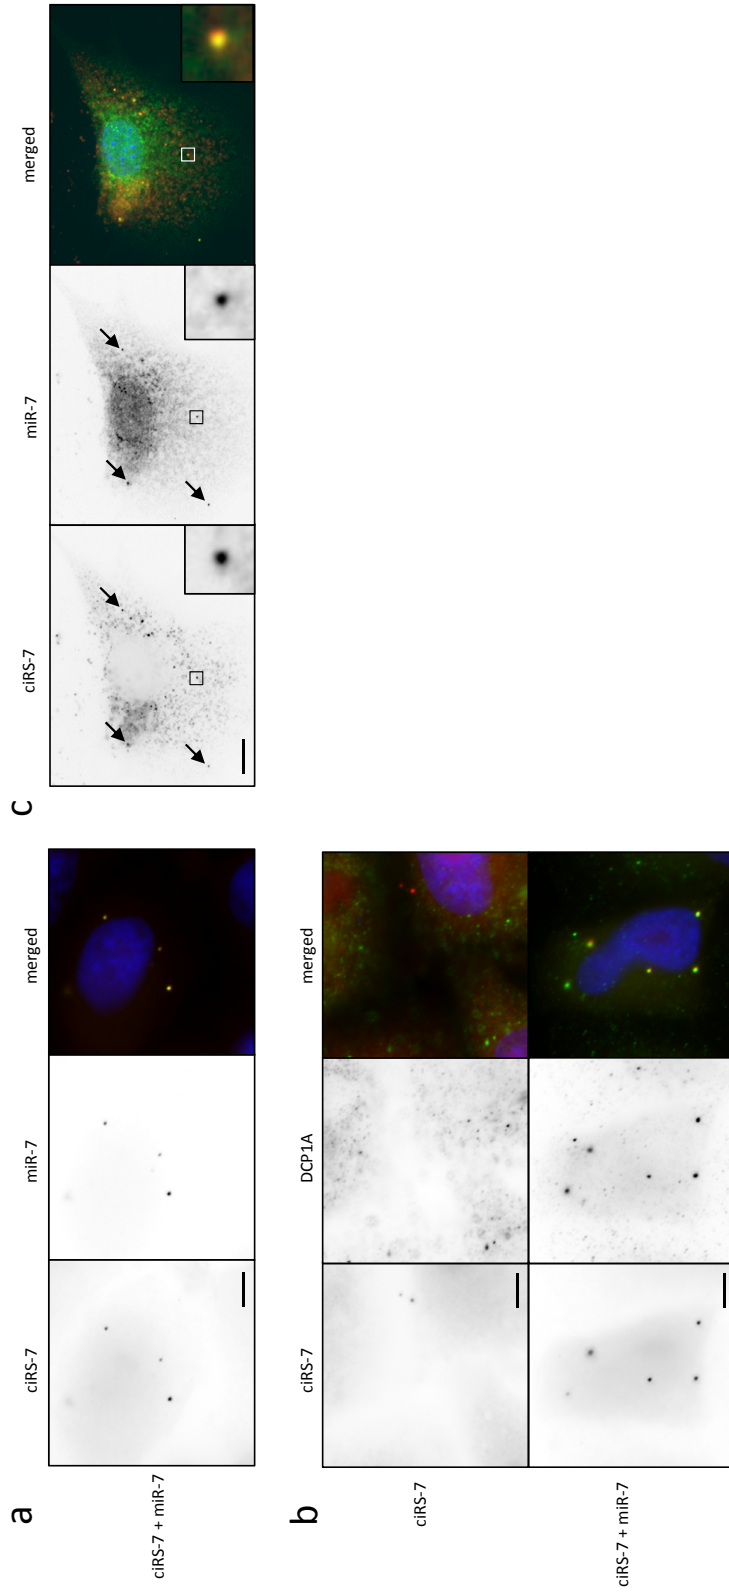

**Supplementary Figure 6: Intracellular localization of ciRS-7 and miR-7.** **a, b**, RNA-FISH and IF-FISH on HeLa cells transfected with constructs as indicated (as in Fig 2c-d). **c**, RNA-FISH on primary cells extracted from mouse brain using Cy3-labelled ciRS-7 probe (left panel), Cy5-labelled murine miR-7 probe (middle panel) and merged (right panel). Scale bars, 5  $\mu$ m.

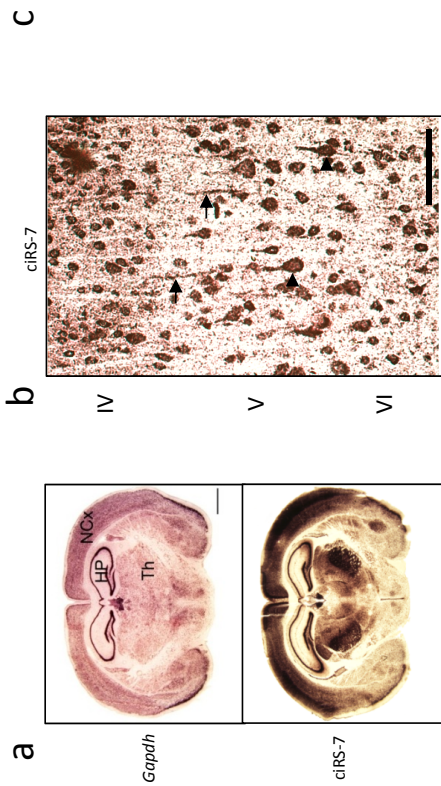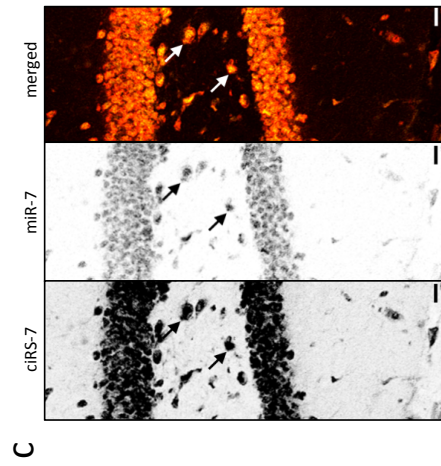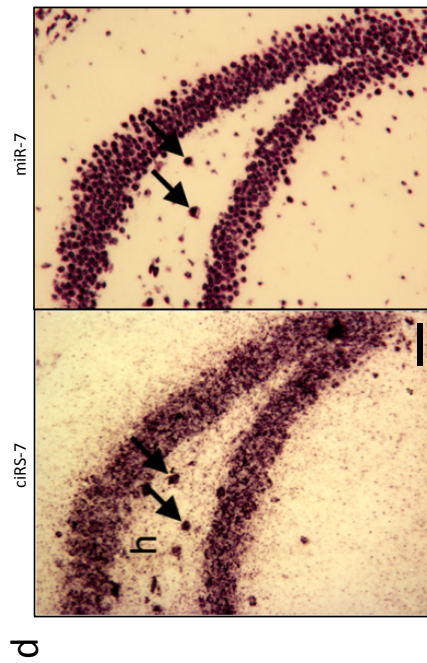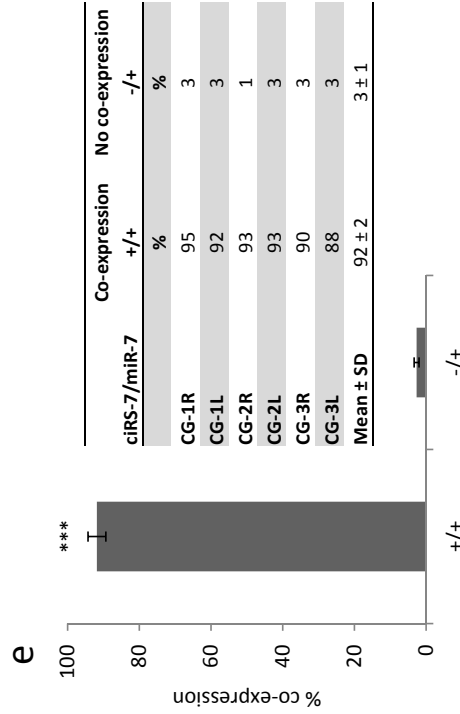

**Supplementary Figure 7: Sub-brain expression of ciRS-7 and miR-7 in mouse.** **a**, Mouse brains sections hybridized with alkaline phosphatase-coupled probes specific for *GAPDH* mRNA (top panel) or ciRS-7 (bottom panel). HP, hippocampus; NCx, neocortex; Th, thalamus. **b**, ciRS-7 is expressed in the neuronal cell body (arrowheads) and dendrites (arrows), here shown for layer IV-VI of somatosensory cortex in a 5µm thick section. **c**, Double fluorescence *in situ* hybridization showing co-expression between ciRS-7 (left panel) and miR-7 (right panel) visualized by confocal microscopy. **d**, *In situ* hybridization for ciRS-7 (left panel) and miR-7 (right panel) performed on adjacent, 5 µm thick sections, which allows identification of co-expressing neurons (arrows), here shown for the dentate hilus (h). For presentation one of the digitalized images was laterally reversed. **e**, Quantitative data on % co-expression between ciRS-7 and miR-7 in cingulate gyrus (CG) layer IV-V. Table shows data obtained from right (R) and left (L) CG. Data are presented as mean ± SD. \*\*\*,  $p < 0.001$ . Bar: 1 mm (a), 100 µm (b), 10 µm (c) and 50 µm (d).



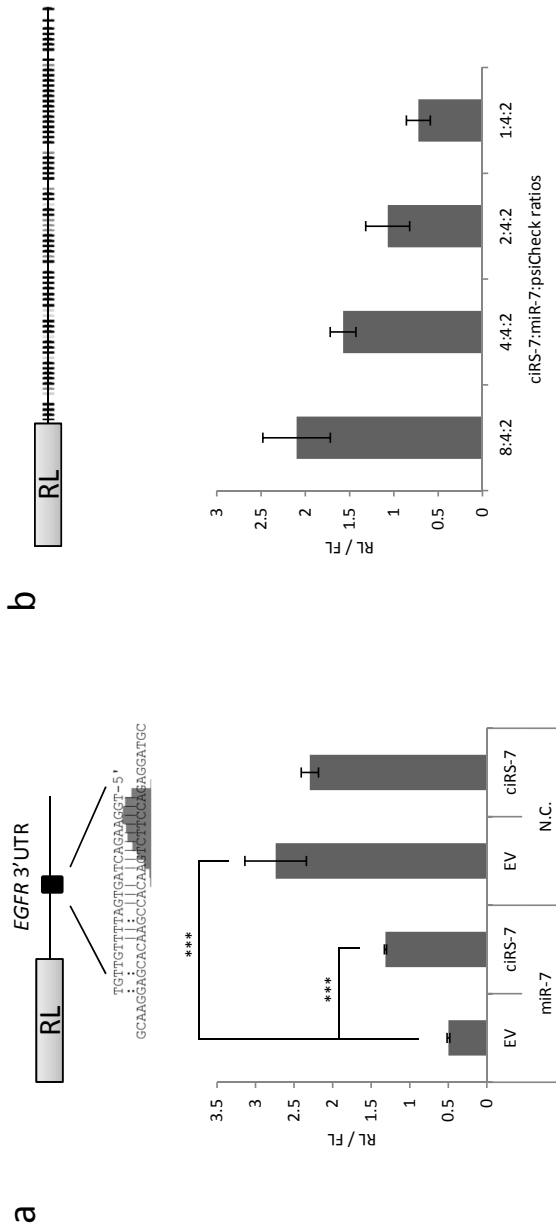

**Supplementary Figure 8: Luciferase reporter assay** **a**, The 3' UTR of miR-7 target gene, *EGFR*, was inserted into psiCheck vector (schematic representation of target site depicted above). HEK293 cells in 12-well plates were co-transfected with 0.5 µg empty vector (EV) or pcDNA3-ciRS-7 together with 10 nM miR-7 mimic siRNA or 10 nM N.C. (negative control siRNA) and 0.1 µg psiCheck reporter plasmid containing the entire *EGFR* 3' UTR. Forty eight hours after transfection, relative luminescence was measured and plotted. **b**, Vectors expressing ciRS-7 (pcDNA3-ciRS-7), miR-7 (pJEBB-7) and psiCheck-ciRS-7 were transfected in various plasmid weight ratios as indicated. Forty eight hours after transfection, relative luminescence was measured and plotted. Error bars represent s.d. (n=3). \*\*\*, p<0.001.

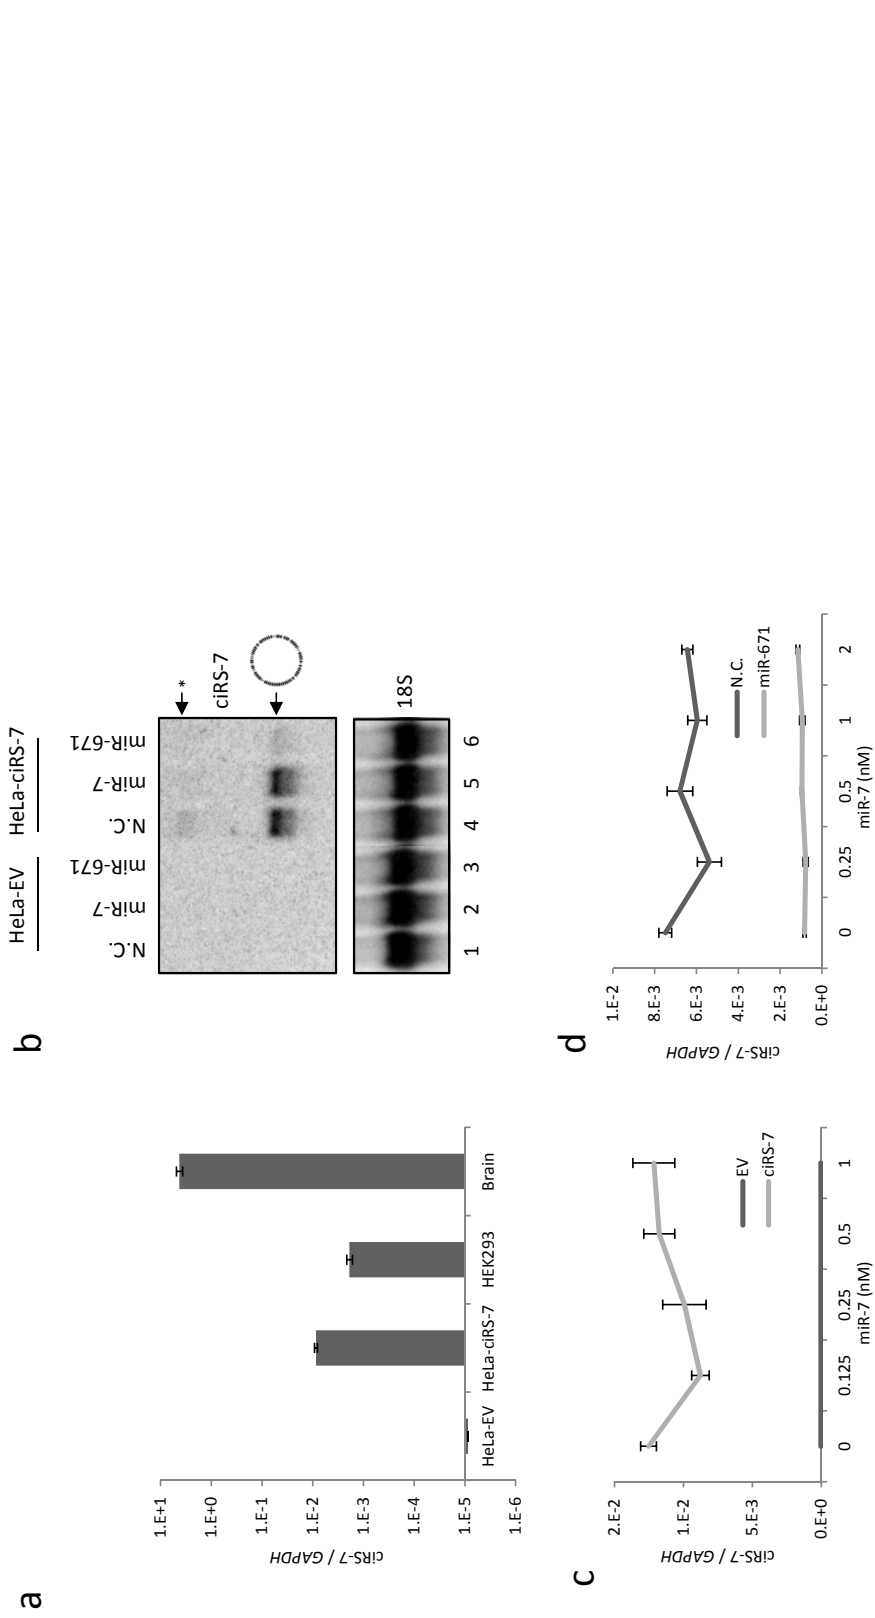

**Supplementary Figure 9: Stable expression of ciRS-7 in HeLa cells.** **a**, qRT-PCR on RNA purified from HeLa-EV, HeLa-ciRS-7, HEK293 cells, and total brain quantifying ciRS-7 levels relative to *GAPDH* mRNA. **b**, Northern blot using 10  $\mu$ g RNA from HeLa-EV (with empty vector expression cassette) or HeLa-ciRS-7 (with ciRS-7 expression cassette). Cells were transfected with 10 nM non-circular RNA species produced from the ciRS-7 construct (N.C.), miR-7 or miR-671 mimic siRNAs as indicated. The blot was probed with ciRS-7 and 18S (loading control). The asterisk (\*) denotes a high-molecular, non-circular RNA species produced from the ciRS-7 construct. **c**, **d**, RT-qPCR quantification of ciRS-7 in HeLa-ciRS-7 (light grey line) or HeLa-EV cells (dark grey line) transfected with gradient concentration of miR-7 (c) or in HeLa-ciRS-7 cells transfected with miR-671 mimic siRNA (light grey line) or N.C. (negative control; dark grey line) siRNA 24 hrs prior to transfections with miR-7 gradient (d). Error bars represent s.d. (n=4).

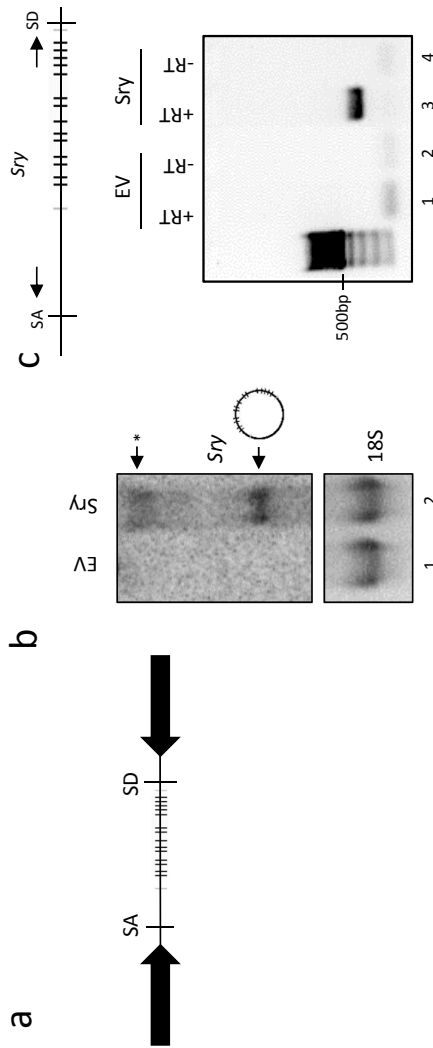

**Supplementary Figure 10: Sponging of miR-138 by Sry circRNA expression.** **a**, Schematic representation of Sry expression vector (pcDNA3-Sry) in which the tet-responsive CMV promoter from the pcDNA5/FRT/TO vector has been inserted in an inverted orientation downstream the Sry locus. **b**, Northern blot using 10 µg RNA from HEK293 cells transfected with either empty vector (EV, pcDNA3) or the Sry expression construct (pcDNA3-Sry). Blot was probed with Sry and 18S (upper and lower panel, respectively). Position of the circular Sry RNA is indicated. The asterisk (\*) denotes a high-molecular, non-circular RNA species produced from the Sry construct. **c**, RT-PCR on RNA from HEK293 cells transfected with either empty vector (EV, pcDNA3) or Sry expression vector (pcDNA3-Sry) using primers depicted with arrows above. RT reactions were performed with (+RT) or without reverse transcriptase (-RT) as control.

## References

1. Bailey, T. L. & Elkan, C. Fitting a mixture model by expectation maximization to discover motifs in biopolymers. *Proc. Int. Conf. Intell. Syst. Mol. Biol.* **2**, 28-36 (1994).
2. Andronescu, M., Zhang, Z. C. & Condon, A. Secondary structure prediction of interacting RNA molecules. *J. Mol. Biol.* **345**, 987-1001 (2005).
3. Chi, S. W., Zang, J. B., Mele, A. & Darnell, R. B. Argonaute HITS-CLIP decodes microRNA-mRNA interaction maps. *Nature* **460**, 479-486 (2009).
4. Hansen, T. B. *et al.* miRNA-dependent gene silencing involving Ago2-mediated cleavage of a circular antisense RNA. *EMBO J.* **30**, 4414-4422 (2011).
